# Supplementary material for: Green Extraction Techniques for Obtaining Bioactive Compounds from Mandarin Peel (Citrus unshiu var. Kuno): Phytochemical Analysis and Process Optimization
Source: MDPI journal article supplement (doi:10.3390/foods10051043), 2021-05-11
Supplement: s1 [file s1]

**Supplementary Material for**

**Green Extraction Techniques for Obtaining Bioactive  
Compounds from Mandarin Peel (*Citrus unshiu* var. *Kuno*):  
Phytochemical Analysis and Process Optimization**

**Silvija Šafranko<sup>1</sup>, Ina Ćorković<sup>1</sup>, Igor Jerković<sup>2</sup>, Martina Jakovljević<sup>1</sup>, Krunoslav Aladić<sup>1</sup>,  
Drago Šubarić<sup>1</sup>, Stela Jokić<sup>1\*</sup>**

<sup>1</sup>Faculty of Food Technology Osijek, University of Osijek, Franje Kuhača 18, 31000 Osijek, Croatia;  
silvija.safranko@ptfos.hr (S.Š.); ina.corkovic@ptfos.hr (I.Ć.); mjakovljevic@ptfos.hr (M.J.);  
kaladic@ptfos.hr (K.A.) dsubaric@ptfos.hr (D.Š.); sjokic@ptfos.hr (S.J.)

<sup>2</sup>Faculty of Chemistry and Technology, University of Split, Ruđera Boškovića 35, 21000 Split, Croatia;  
igor@ktf-split.hr (I.J.)

\*Correspondence: e-mail: sjokic@ptfos.hr; Tel.: 00385 31 224 333 (S.J.)

## Figure captions:

**Figure S1.** HPLC chromatograms (selected sample 8 sample 17).

**Figure S2.** Comparison of UV spectra of standards and unknown peaks; A) hesperidin, B) narirutin, C) rutin, D) 5-HMF, and E) chlorogenic acid.

**Figure S3.** 3D diagrams of the effects of process parameters on the formation of narirutin in SWE extracts of mandarin peel (*Citrus unshiu* var. *Kuno*).

**Figure S4.** 3D diagrams of the effects of process parameters on the formation of rutin in SWE extracts of mandarin peel (*Citrus unshiu* var. *Kuno*).

**Figure S5.** 3D diagram of the effects of process parameters on the formation of chlorogenic acid in SWE extracts of mandarin peel (*Citrus unshiu* var. *Kuno*).

Figure S1

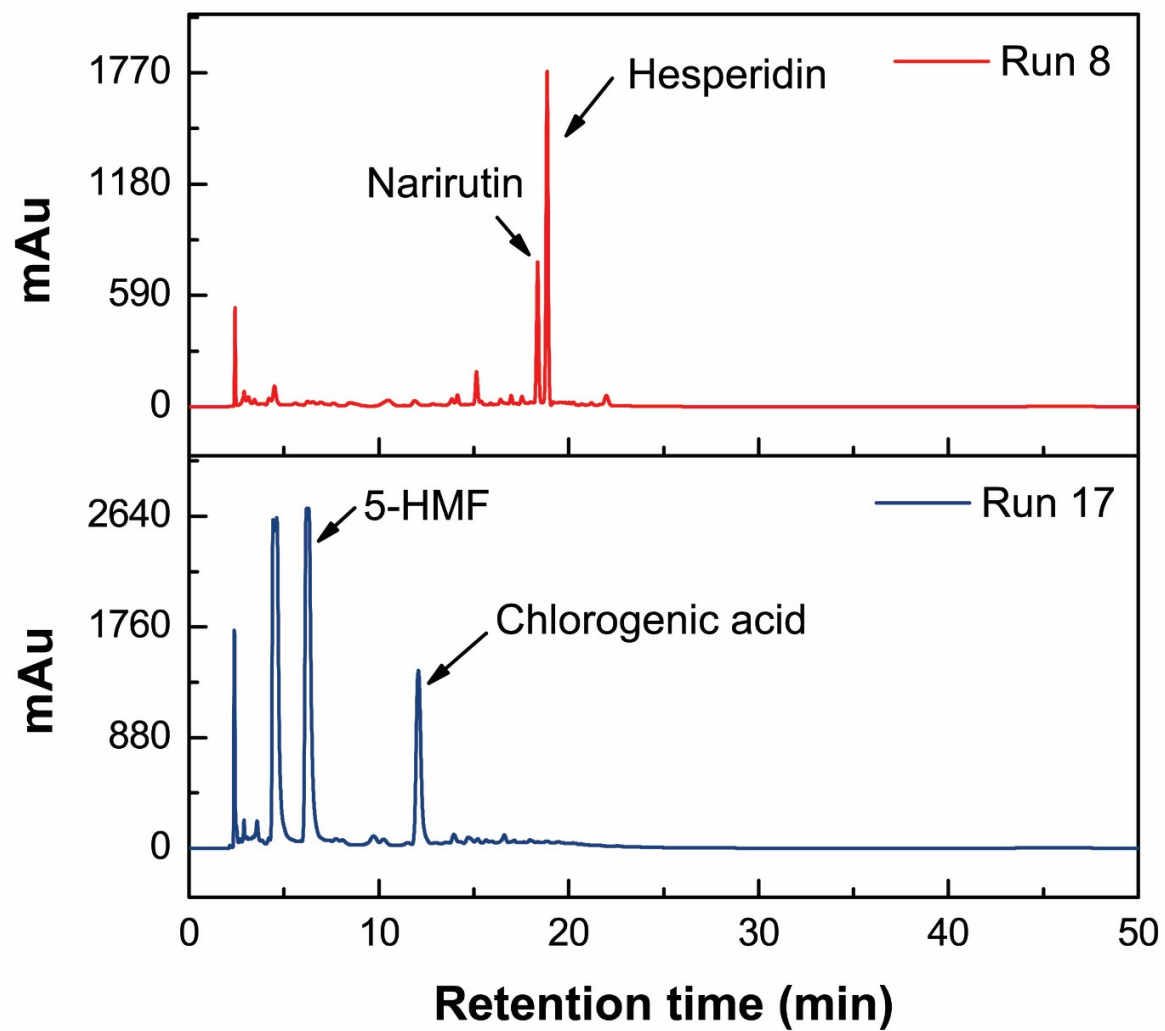

Figure S2

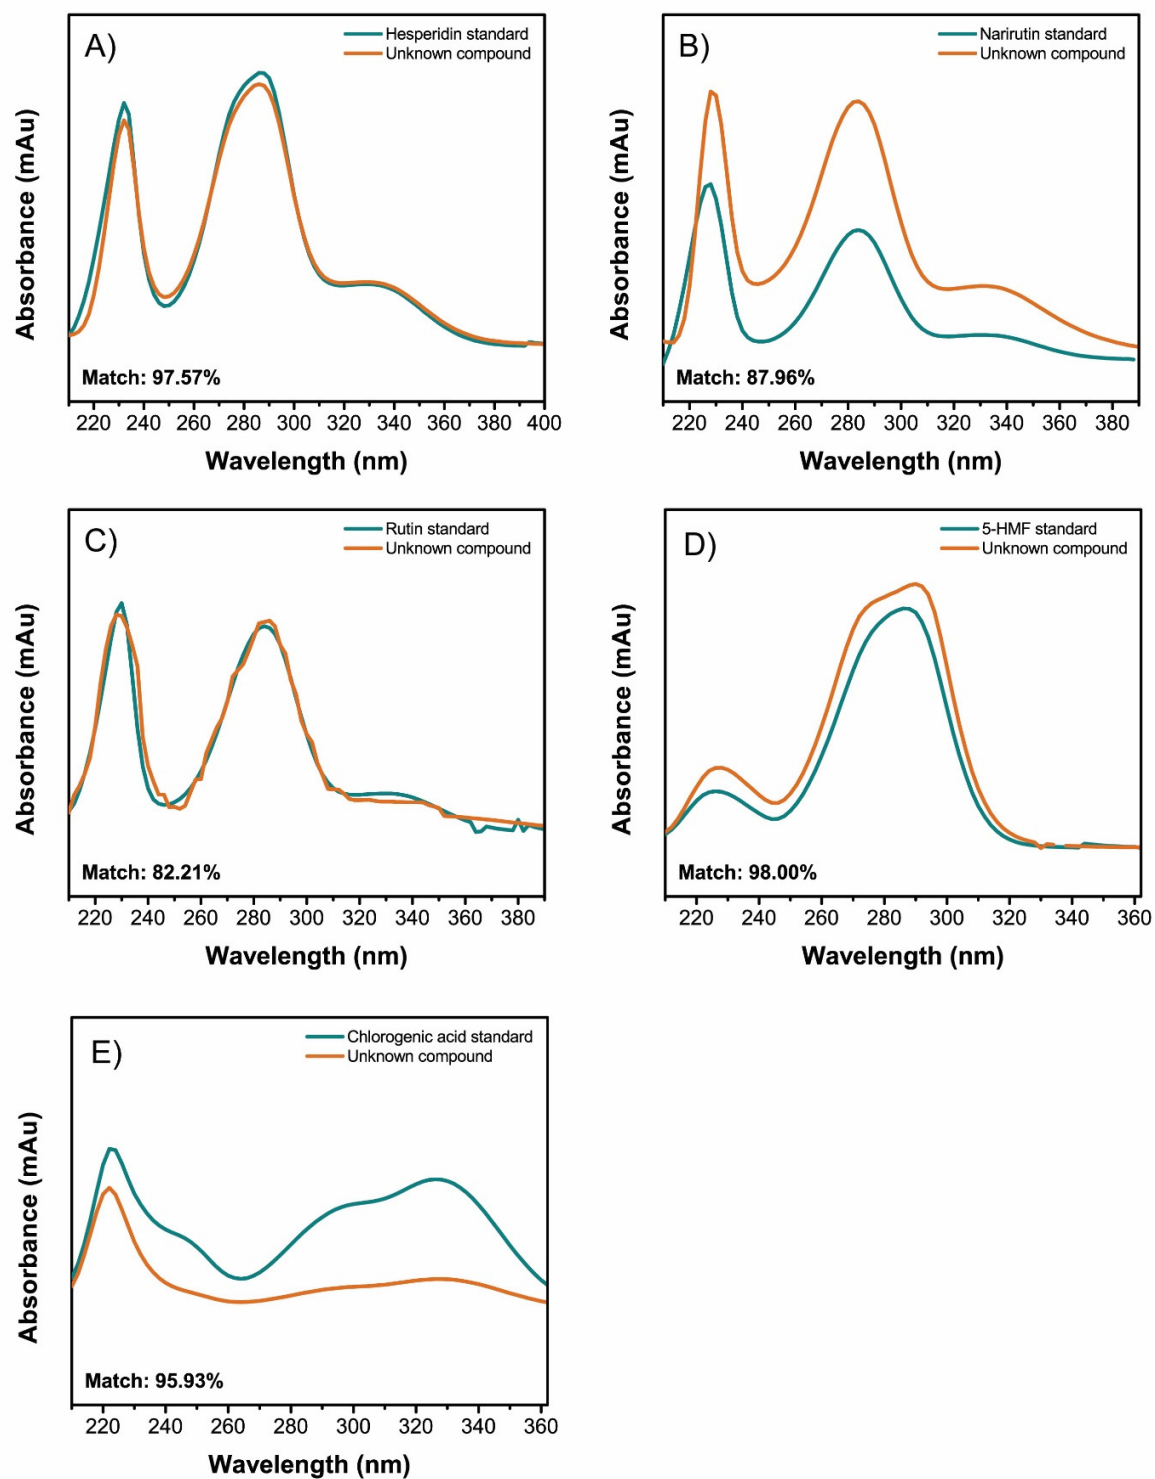

**Figure S3**

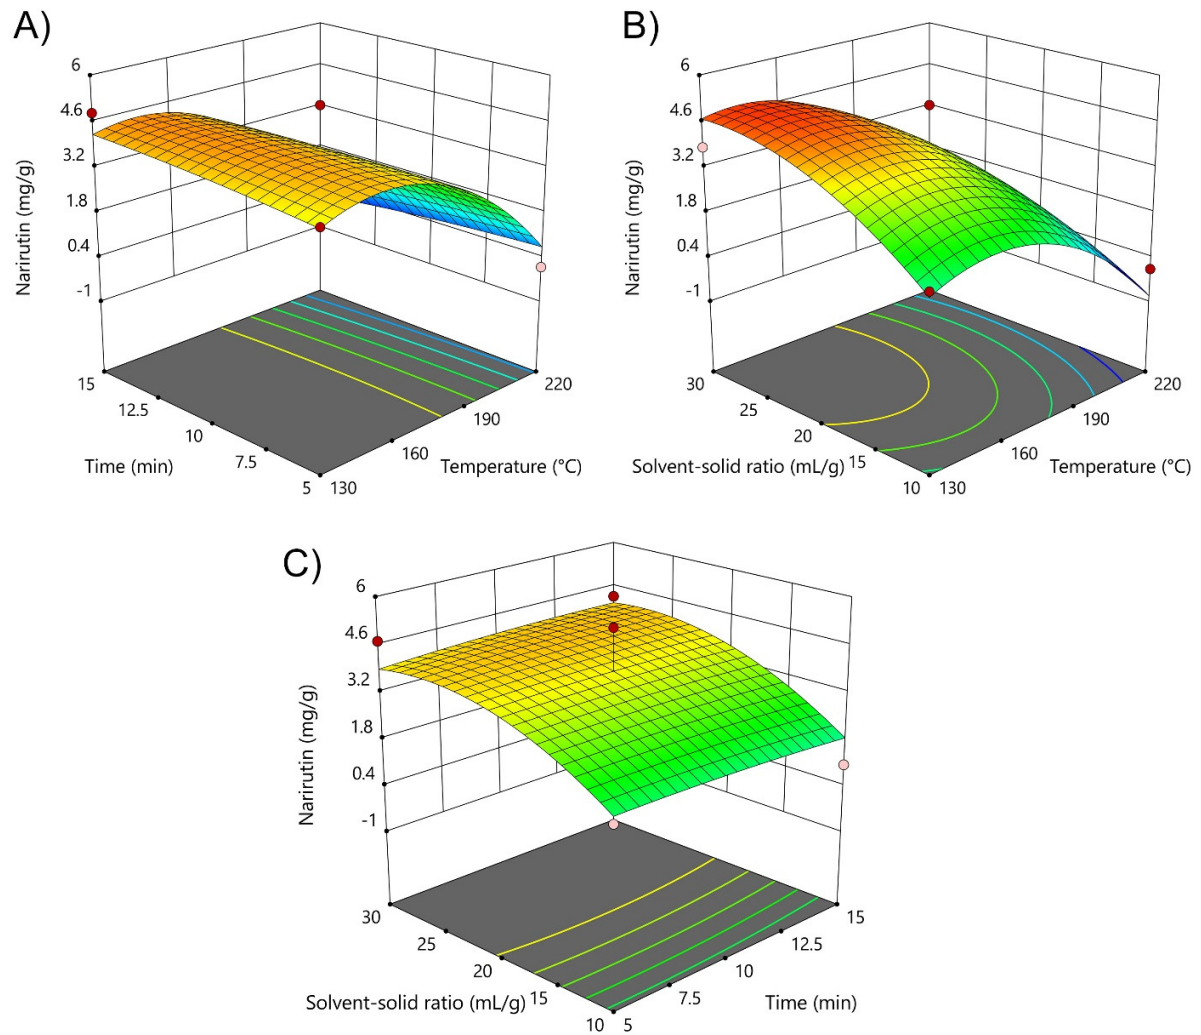

**Figure S4**

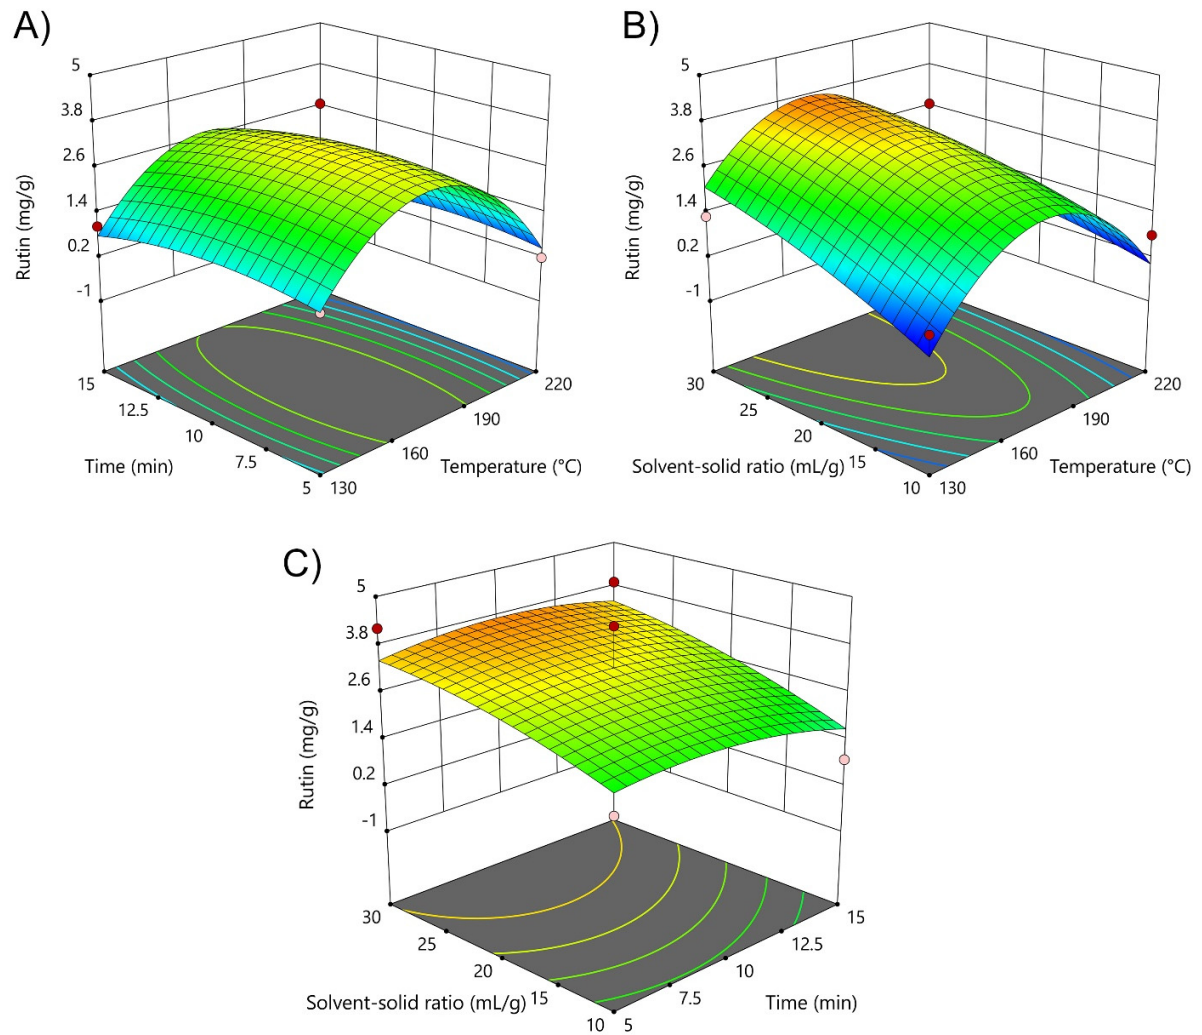

Figure S5

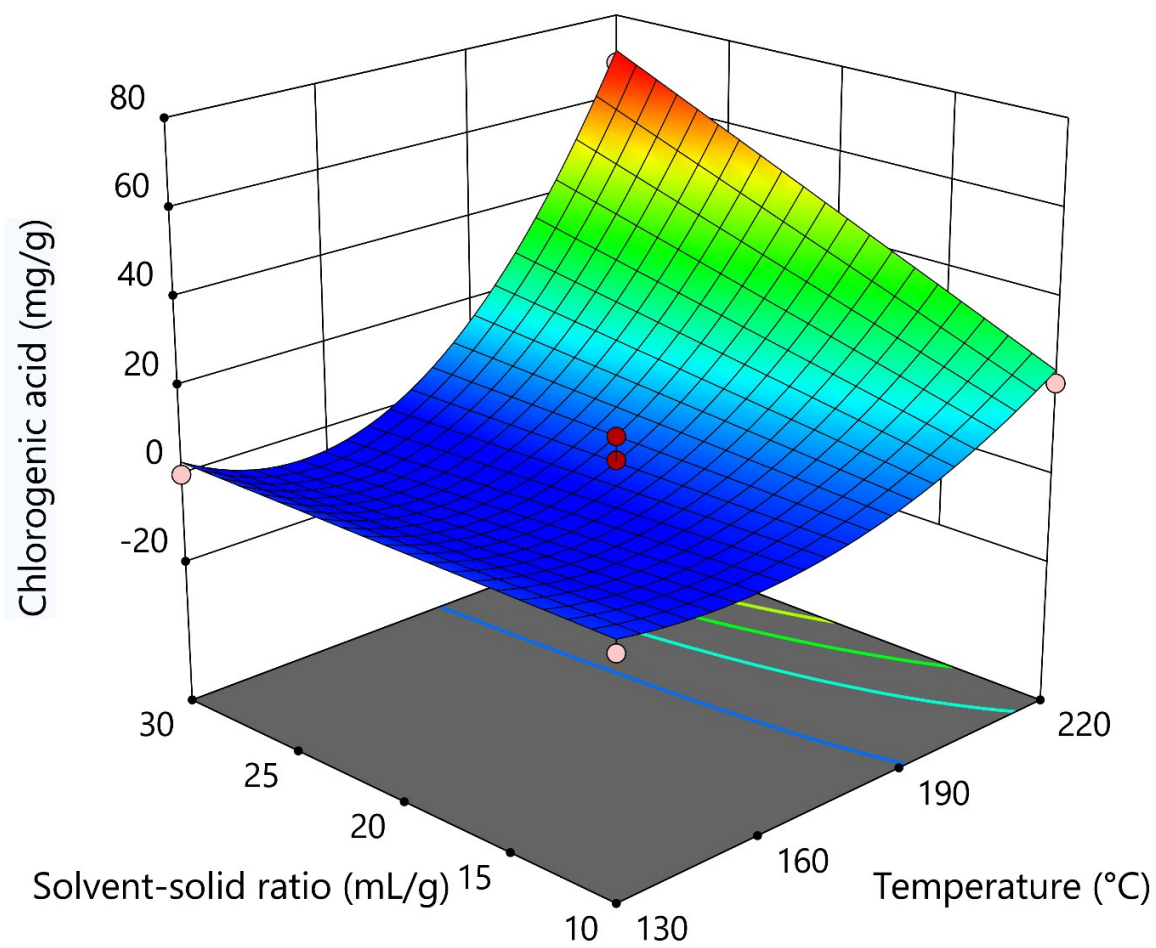

Table S1. Analysis of variance (ANOVA) of second-order polynomial models for 5-HMF content in the mandarin peels (*Citrus unshiu* var. *Kuno*) obtained by SWE technique.

| Source                      | Sum of Squares | Degree of Freedom (df) | Mean Square | F Value | p-Value <sup>a</sup> |
|-----------------------------|----------------|------------------------|-------------|---------|----------------------|
| Model                       | 241.09         | 9                      | 26.79       | 23.29   | 0.0002               |
| $X_1$ - temperature         | 163.24         | 1                      | 163.24      | 141.91  | <0.0001              |
| $X_2$ - time                | 0.2552         | 1                      | 0.2552      | 0.22    | 0.6520               |
| $X_3$ - solvent-solid ratio | 41.72          | 1                      | 41.72       | 36.27   | 0.0005               |
| $X_1X_2$                    | 3.35           | 1                      | 3.35        | 2.91    | 0.1316               |
| $X_1X_3$                    | 19.95          | 1                      | 19.95       | 17.35   | 0.0042               |
| $X_2X_3$                    | 0.25           | 1                      | 0.25        | 0.22    | 0.6553               |
| $X_1^2$                     | 10.93          | 1                      | 10.93       | 9.50    | 0.0177               |
| $X_2^2$                     | 0.20           | 1                      | 0.20        | 0.17    | 0.6886               |
| $X_3^2$                     | 1.45           | 1                      | 1.45        | 1.26    | 0.2984               |
| Residual                    | 8.05           | 7                      | 1.15        |         |                      |
| Lack of fit                 | 5.88           | 3                      | 1.96        | 3.60    | 0.1238               |
| Pure error                  | 2.18           | 4                      | 0.5439      |         |                      |
| Total                       | 249.15         | 16                     |             |         |                      |
| $R^2$                       | 0.9677         |                        |             |         |                      |

<sup>a</sup>  $p < 0.01$  highly significant;  $0.01 \leq p < 0.05$  significant;  $p \geq 0.05$  not significant.



Table S2. Analysis of variance (ANOVA) of second-order polynomial models for hesperidin content in the mandarin peels (*Citrus unshiu* var. *Kuno*) obtained by SWE technique.

| Source                      | Sum of Squares | Degree of Freedom (df) | Mean Square | F Value | p-Value <sup>a</sup> |
|-----------------------------|----------------|------------------------|-------------|---------|----------------------|
| Model                       | 371.66         | 9                      | 41.30       | 10.61   | 0.0026               |
| $X_1$ - temperature         | 109.44         | 1                      | 109.44      | 28.11   | 0.0011               |
| $X_2$ - time                | 6.10           | 1                      | 6.10        | 1.57    | 0.2510               |
| $X_3$ - solvent-solid ratio | 54.30          | 1                      | 54.30       | 13.95   | 0.0073               |
| $X_1X_2$                    | 3.87           | 1                      | 3.87        | 0.9942  | 0.3519               |
| $X_1X_3$                    | 10.05          | 1                      | 10.05       | 2.58    | 0.1522               |
| $X_2X_3$                    | 2.98           | 1                      | 2.98        | 0.7649  | 0.4108               |
| $X_1^2$                     | 182.13         | 1                      | 182.13      | 46.78   | 0.0002               |
| $X_2^2$                     | 2.59           | 1                      | 2.59        | 0.6663  | 0.4412               |
| $X_3^2$                     | 0.55           | 1                      | 0.5538      | 0.1422  | 0.7172               |
| Residual                    | 27.26          | 7                      | 3.89        |         |                      |
| Lack of fit                 | 22.23          | 3                      | 7.41        | 5.90    | 0.0597               |
| Pure error                  | 5.03           | 4                      | 1.26        |         |                      |
| Total                       | 398.91         | 16                     |             |         |                      |
| $R^2$                       | 0.9317         |                        |             |         |                      |

<sup>a</sup>  $p < 0.01$  highly significant;  $0.01 \leq p < 0.05$  significant;  $p \geq 0.05$  not significant.

Table S3. Analysis of variance (ANOVA) of second-order polynomial models for narirutin content in the mandarin peels (*Citrus unshiu* var. *Kuno*) obtained by SWE technique.

| Source                      | Sum of Squares | Degree of Freedom (df) | Mean Square | F Value | p-Value |
|-----------------------------|----------------|------------------------|-------------|---------|---------|
| Model                       | 47.72          | 9                      | 5.30        | 6.35    | 0.0118  |
| $X_1$ - temperature         | 24.99          | 1                      | 24.99       | 29.90   | 0.0009  |
| $X_2$ - time                | 0.0058         | 1                      | 0.0058      | 0.0069  | 0.9362  |
| $X_3$ - solvent-solid ratio | 7.90           | 1                      | 7.90        | 9.45    | 0.0180  |
| $X_1X_2$                    | 0.3102         | 1                      | 0.3102      | 0.3712  | 0.5616  |
| $X_1X_3$                    | 0.7676         | 1                      | 0.7676      | 0.9187  | 0.3696  |
| $X_2X_3$                    | 0.0436         | 1                      | 0.0436      | 0.0522  | 0.8258  |
| $X_1^2$                     | 10.36          | 1                      | 10.36       | 12.40   | 0.0097  |
| $X_2^2$                     | 0.0239         | 1                      | 0.0239      | 0.0286  | 0.8705  |
| $X_3^2$                     | 2.58           | 1                      | 2.58        | 3.09    | 0.1221  |
| Residual                    | 5.85           | 7                      | 0.8356      |         |         |
| Lack of fit                 | 3.79           | 3                      | 1.26        | 2.46    | 0.2026  |
| Pure error                  | 2.06           | 4                      | 0.5142      |         |         |
| Total                       | 53.57          | 16                     |             |         |         |
| $R^2$                       | 0.8908         |                        |             |         |         |

<sup>a</sup>  $p < 0.01$  highly significant;  $0.01 \leq p < 0.05$  significant;  $p \geq 0.05$  not significant.

Table S4. Analysis of variance (ANOVA) of second-order polynomial models for rutin content in the mandarin peels (*Citrus unshiu* var. *Kuno*) obtained by SWE technique.

| Source                      | Sum of Squares | Degree of Freedom (df) | Mean Square | F Value | p-Value <sup>a</sup> |
|-----------------------------|----------------|------------------------|-------------|---------|----------------------|
| Model                       | 29.11          | 9                      | 3.23        | 4.36    | 0.0325               |
| $X_1$ - temperature         | 0.7642         | 1                      | 0.7642      | 1.03    | 0.3437               |
| $X_2$ - time                | 0.1556         | 1                      | 0.1556      | 0.21    | 0.6607               |
| $X_3$ - solvent-solid ratio | 4.20           | 1                      | 4.20        | 5.67    | 0.0489               |
| $X_1X_2$                    | 0.00           | 1                      | 0.00        | 0.00    | 0.9964               |
| $X_1X_3$                    | 0.4424         | 1                      | 0.4424      | 0.5969  | 0.4650               |
| $X_2X_3$                    | 0.0605         | 1                      | 0.0605      | 0.0817  | 0.7833               |
| $X_1^2$                     | 22.01          | 1                      | 22.01       | 29.70   | 0.0010               |
| $X_2^2$                     | 0.4767         | 1                      | 0.4767      | 0.6432  | 0.4489               |
| $X_3^2$                     | 0.2183         | 1                      | 0.2183      | 0.2946  | 0.6042               |
| Residual                    | 5.19           | 7                      | 0.7411      |         |                      |
| Lack of fit                 | 3.79           | 3                      | 1.26        | 3.61    | 0.1233               |
| Pure error                  | 1.40           | 4                      | 0.3496      |         |                      |
| Total                       | 34.29          | 16                     |             |         |                      |
| $R^2$                       | 0.8487         |                        |             |         |                      |

<sup>a</sup>  $p < 0.01$  highly significant;  $0.01 \leq p < 0.05$  significant;  $p \geq 0.05$  not significant.

Table S5. Analysis of variance (ANOVA) of reduced third-order polynomial models for chlorogenic acid content in the mandarin peels (*Citrus unshiu* var. *Kuno*) obtained by SWE technique.

| Source             | Sum of Squares | Degree of Freedom (df) | Mean Square | F Value | p-Value <sup>a</sup> |
|--------------------|----------------|------------------------|-------------|---------|----------------------|
| Model              | 8469.29        | 8                      | 1058.66     | 63.19   | < 0.0001             |
| $X_I$ -temperature | 2001.42        | 1                      | 2001.42     | 119.47  | < 0.0001             |
| $X_1X_3$           | 555.10         | 1                      | 555.10      | 33.13   | 0.0004               |
| $X_1^2$            | 2111.05        | 1                      | 2111.05     | 126.01  | < 0.0001             |
| $X_1^2X_3$         | 564.58         | 1                      | 564.58      | 33.70   | 0.0004               |
| $X_1X_2^2$         | 69.88          | 1                      | 69.88       | 4.17    | 0.0754               |
| $X_2^2X_3$         | 9.87           | 1                      | 9.87        | 0.5893  | 0.4648               |
| $X_2X_3^2$         | 25.46          | 1                      | 25.46       | 1.52    | 0.2527               |
| $X_2^3$            | 5.64           | 1                      | 5.64        | 0.3364  | 0.5779               |
| Residual           | 134.02         | 8                      | 16.75       |         |                      |
| Lack of fit        | 87.19          | 4                      | 21.80       | 1.86    | 0.2810               |
| Pure error         | 46.83          | 4                      | 11.71       |         |                      |
| Total              | 8603.31        | 16                     |             |         |                      |
| $R^2$              | 0.9844         |                        |             |         |                      |

<sup>a</sup> p < 0.01 highly significant; 0.01 ≤ p < 0.05 significant; p ≥ 0.05 not significant.
